# Supplementary material for: Marine Noise Effects on Juvenile Sparid Fish Change among Species and Developmental Stages
Source: MDPI journal article supplement (doi:10.3390/d15010092), 2023-01-11
Supplement: s1 [file s1]

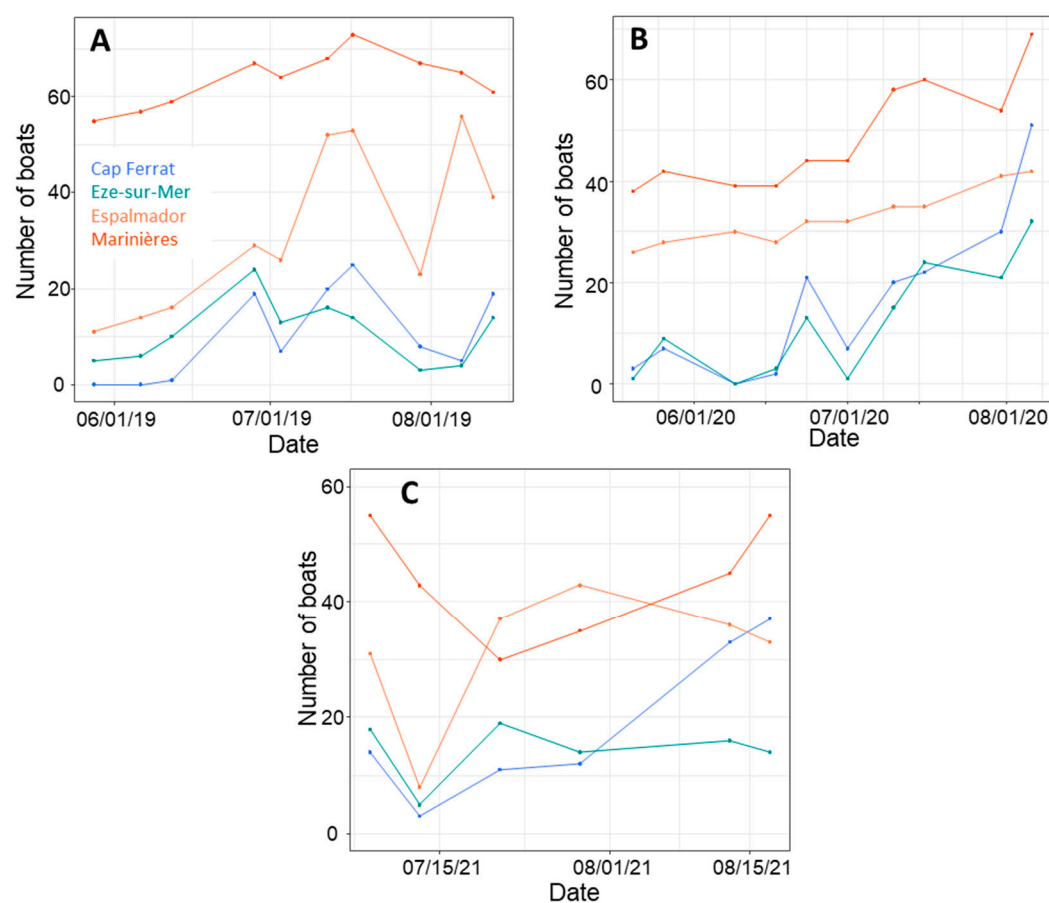

**Figure S1.** Boats counted by photo-sampling at the four sampling locations during the sampling period in 2019 (A), 2020 (B) and 2021(C). Colors of the four lines representing the four sampling locations refer the NI gradient, from the lowest level of noise (blue/green lines) to the highest (red line). In spite of a non-negligible variability in time (especially among sampling dates), a consistent pattern across years emerges, with Marinières being the location with the highest NI value, and Eze-sur-Mer and Cap Ferrat being the locations with the lowest NI values.

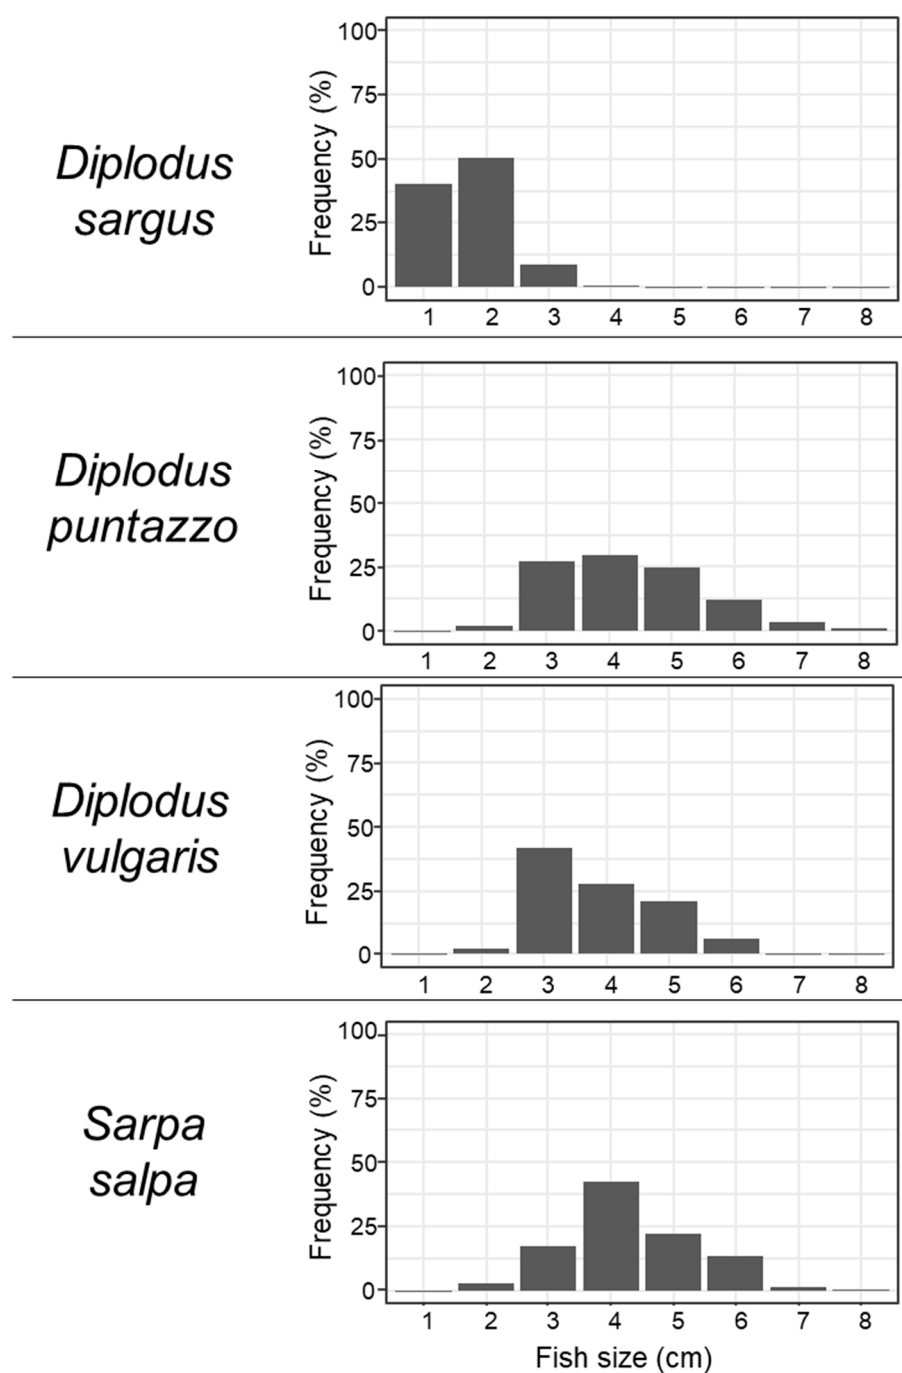

**Figure S2.** Size-frequency distributions of juveniles of *Diplodus sargus*, *D. puntazzo*, *D. vulgaris* and *Sarpa salpa* at the two first sampling dates (data were pooled for 2019, 2020 and 2021, the general patterns being similar) showing that, initially, *D. sargus* were early settlers (smaller in size: modal class=2 cm, max=3 cm standard length, SL), while the other species (*D. puntazzo*, *D. vulgaris* and *Sarpa salpa*) were late post-settlers (bigger in size: modal classes= 3–5 cm; max=7–8 cm SL).

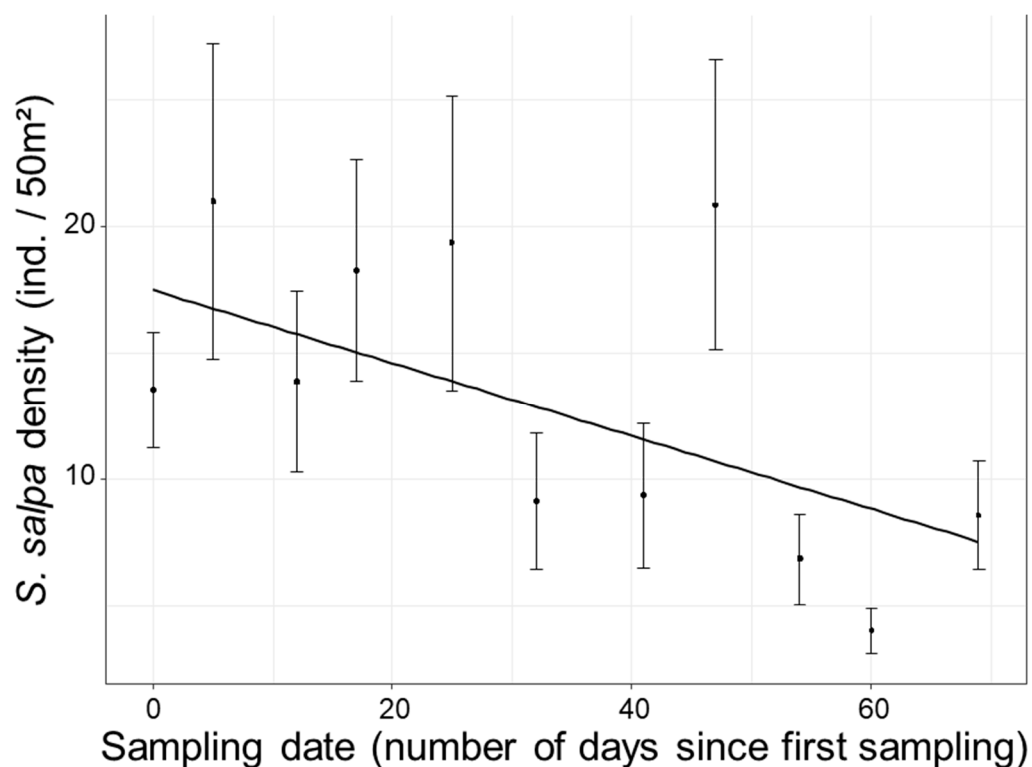

**Figure S3.** Mean ( $\pm$ SE) values of density of juveniles of *S. salpa* across sampling dates in 2020. Each point represents the mean density for each level of sampling date investigated. The line represents the linear relation between density of juveniles of *S. salpa* across sampling dates.

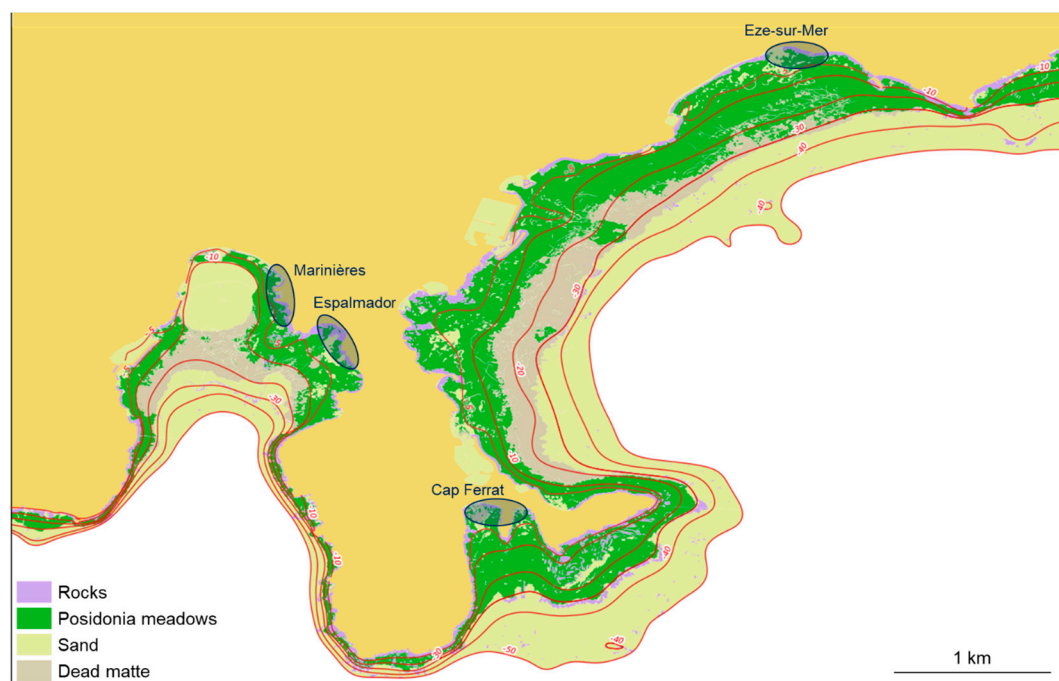

**Figure S4.** Bathymetry (from -5 to -40 m; red lines) and biocenoses of the study area. Blue ovals represent the 4 study locations (DONIA: Habitat cartography - Data consulted 10/2021 on the MEDTRIX surveillance platform) (<https://plateforme.medtrix.fr>).

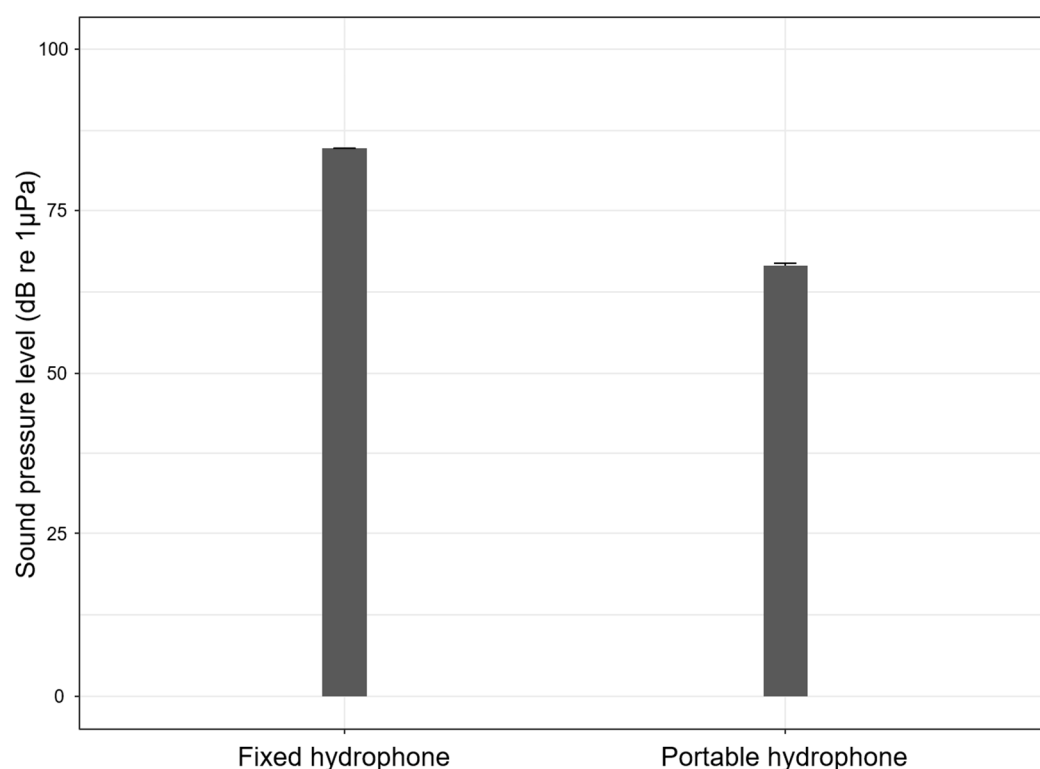

**Figure S5.** Mean values ( $\pm$ SE) of sound pressure level in the third octave band centered around 250 Hz (where most of the anthropogenic continuous noise is produced) recorded within contemporaneous temporal windows by hydrophones located at 10 m (fixed) and 1 m depth (portable; the microhabitat for settlement of most sparid fishes), at the four sampling locations.

**Table S1.** Outputs of the ANOVA computed on the ManyGLM for the three sampling years.

| <i>Year/Source</i>       | <i>Res.Df</i> | <i>Df diff</i> | <i>Dev</i> | <i>Pr(&gt;Dev)</i> |
|--------------------------|---------------|----------------|------------|--------------------|
| <b>2019</b>              |               |                |            |                    |
| (Intercept)              | 385           |                |            |                    |
| Sampling Date            | 384           | 1              | 180.67     | < 2e-16 ***        |
| NI                       | 383           | 1              | 92.77      | < 2e-16 ***        |
| Sampling Date * NI       | 382           | 1              | 24.07      | 0.001 ***          |
| Site (NI)                | 372           | 11             | 225.36     | < 2e-16 ***        |
| <b>2020</b>              |               |                |            |                    |
| (Intercept)              | 443           |                |            |                    |
| Sampling Date            | 442           | 1              | 121.94     | < 2e-16 ***        |
| Location                 | 439           | 3              | 95.15      | < 2e-16 ***        |
| Sampling Date * Location | 436           | 3              | 47.64      | 0.001 ***          |
| Site (Location)          | 428           | 11             | 148.17     | 0.001 ***          |
| <b>2021</b>              |               |                |            |                    |
| (Intercept)              | 453           |                |            |                    |
| Sampling Date            | 452           | 1              | 133.38     | < 2e-16 ***        |
| Location                 | 449           | 3              | 131.24     | < 2e-16 ***        |

|                             |     |    |        |             |
|-----------------------------|-----|----|--------|-------------|
| Sampling Date *<br>Location | 446 | 3  | 11.01  | 0.783       |
| Site (Location)             | 438 | 11 | 127.35 | < 2e-16 *** |

**Table S2.** Outputs of the post-hoc analyses performed the ManyGLM for 2020 and 2021.

| <i>Year/Pairwise comparison result</i> | <i>Observed statistic</i> | <i>Free stepdown adjusted P-value</i> |
|----------------------------------------|---------------------------|---------------------------------------|
| 2020                                   |                           |                                       |
| Eze-sur-mer vs. Marinières             | 60.14                     | < 2e-16 ***                           |
| Cap Ferrat vs. Marinières              | 41.66                     | < 2e-16 ***                           |
| Espalmador vs. Eze-sur-Mer             | 34.35                     | < 2e-16 ***                           |
| Cap Ferrat vs. Espalmador              | 24.02                     | 0.002 ***                             |
| Cap Ferrat vs. Eze-sur-mer             | 16.07                     | 0.023 *                               |
| Espalmador vs. Marinières              | 5.88                      | 0.368                                 |
| 2021                                   |                           |                                       |
| Eze-sur-mer vs. Marinières             | 70.33                     | < 2e-16 ***                           |
| Cap Ferrat vs. Marinières              | 57.35                     | < 2e-16 ***                           |
| Espalmador vs. Eze-sur-Mer             | 46.64                     | < 2e-16 ***                           |
| Cap Ferrat vs. Espalmador              | 35.65                     | < 2e-16 ***                           |
| Cap Ferrat vs. Eze-sur-mer             | 23.63                     | 0.001 ***                             |
| Espalmador vs. Marinières              | 19.41                     | 0.002 ***                             |

**Table S3.** Results of the univariate test from the output of the ANOVA computed on the ManyGLM for the three sampling years.

| Species                  | D. puntazzo |             | D. sargus |             | D. vulgaris |             | O. melanura |             | S. salpa |           |
|--------------------------|-------------|-------------|-----------|-------------|-------------|-------------|-------------|-------------|----------|-----------|
| 2019                     |             |             |           |             |             |             |             |             |          |           |
|                          | Dev         | Pr(>Dev)    | Dev       | Pr(>Dev)    | Dev         | Pr(>Dev)    | Dev         | Pr(>Dev)    | Dev      | Pr(>Dev)  |
| Sampling Date            | 116.784     | < 2e-16 *** | 10.311    | 0.003 **    | 18.55       | < 2e-16 *** | 33.864      | < 2e-16 *** | 1.164    | 0.262     |
| NI                       | 4.167       | 0.150       | 29.531    | < 2e-16 *** | 50.434      | < 2e-16 *** | 2.659       | 0.199       | 5.979    | 0.082     |
| Sampling Date * NI       | 7.589       | 0.049 *     | 0.353     | 0.846       | 14.43       | 0.002***    | 0.013       | 0.921       | 1.685    | 0.559     |
| Site (NI)                | 32.707      | 0.002 ***   | 48.303    | < 2e-16 *** | 34.587      | 0.001 ***   | 79.118      | < 2e-16 *** | 30.642   | 0.002 *** |
| 2020                     |             |             |           |             |             |             |             |             |          |           |
|                          | Dev         | Pr(>Dev)    | Dev       | Pr(>Dev)    | Dev         | Pr(>Dev)    | Dev         | Pr(>Dev)    | Dev      | Pr(>Dev)  |
| Sampling Date            | 21.423      | < 2e-16 *** | 20.997    | < 2e-16 *** | 62.272      | < 2e-16 *** | 5.814       | 0.009 *     | 11.435   | 0.002 *** |
| Location                 | 14.759      | 0.032 *     | 17.809    | 0.014 *     | 40.312      | < 2e-16 *** | 2.731       | 0.662       | 19.536   | 0.009 *** |
| Sampling Date * Location | 11.959      | 0.087       | 14.795    | 0.046*      | 12.896      | 0.069       | 1.708       | 0.824       | 6.285    | 0.388     |

|                          |        |             |        |             |        |             |         |             |        |             |
|--------------------------|--------|-------------|--------|-------------|--------|-------------|---------|-------------|--------|-------------|
| Site (Location)          | 27.955 | 0.022*      | 22.174 | 0.107       | 33.432 | 0.005 **    | 15.729  | 0.325       | 48.882 | 0.001 ***   |
| <b>2021</b>              |        |             |        |             |        |             |         |             |        |             |
|                          | Dev    | Pr(>Dev)    | Dev    | Pr(>Dev)    | Dev    | Pr(>Dev)    | Dev     | Pr(>Dev)    | Dev    | Pr(>Dev)    |
| Sampling Date            | 47.097 | < 2e-16 *** | 13.528 | 0.003 **    | 6.564  | 0.015 *     | 44.866  | < 2e-16 *** | 21.322 | < 2e-16 *** |
| Location                 | 32.499 | < 2e-16 *** | 34.129 | < 2e-16 *** | 57.964 | < 2e-16 *** | 0.349   | 0.950       | 6.296  | 0.164       |
| Sampling Date * Location | 3.618  | 0.820       | 2.413  | 0.876       | 3.895  | 0.820       | 0.393   | 0.983       | 0.69   | 0.983       |
| Site (Location)          | 31.191 | 0.00. **    | 26.027 | 0.012 *     | 45.631 | < 2e-16 *** | 219.807 | 0.063       | 4.691  | 0.738       |

**Table S4.** Outputs of the ANOVA computed on the *D. sargus* glmmTMB model for the three sampling years.

| <b>Source</b>            | <b><math>\chi^2</math></b> | <b>Df</b> | <b>Pr(&gt;Dev)</b> |
|--------------------------|----------------------------|-----------|--------------------|
| <b>2019</b>              |                            |           |                    |
| Sampling Date            | 7.2846                     | 1         | 0.0069548 **       |
| NI                       | 11.2043                    | 1         | 0.0008161 ***      |
| Sampling Date * NI       | 0.1811                     | 1         | 0.6704658          |
| <b>2020</b>              |                            |           |                    |
| Sampling Date            | 62.8164                    | 1         | 2.269e-15 ***      |
| Location                 | 11.7199                    | 3         | 0.008407 **        |
| Sampling Date * Location | 9.0611                     | 3         | 0.028489 *         |
| <b>2021</b>              |                            |           |                    |
| Sampling Date            | 6.3110                     | 1         | 0.01200 *          |
| Location                 | 7.8382                     | 3         | 0.04948 *          |
| Sampling Date * Location | 1.9627                     | 3         | 0.58019            |

**Table S5.** Post-hocs analyses of the ANOVA computed on the *D. sargus* glmmTMB model for the factor location in 2021.

| <b>Pairwise comparison</b> | <b>Estimate</b> | <b>SE</b> | <b>df</b> | <b>t.ratio</b> | <b>P-value</b> |
|----------------------------|-----------------|-----------|-----------|----------------|----------------|
| Cap Ferrat vs. Espalmador  | 1.066           | 0.641     | 371       | 1.664          | 0.3442         |
| Cap Ferrat vs. Eze-sur-Mer | -0.609          | 0.617     | 371       | 1.778          | 0.7569         |
| Cap Ferrat vs. Marinieres  | 0.523           | 0.626     | 371       | 0.836          | 0.8373         |
| Espalmador vs. Eze-sur-Mer | -1.676          | 0.626     | 371       | -2.675         | 0.0389*        |

|                            |        |       |     |        |        |
|----------------------------|--------|-------|-----|--------|--------|
| Espalmador vs. Marinieres  | -0.543 | 0.636 | 371 | -0.854 | 0.8284 |
| Eze-sur-Mer vs. Marinieres | 1.133  | 0.611 | 371 | 1.855  | 0.2494 |

**Table S6.** Outputs of the ANOVA computed on the *D. puntazzo* glmmTMB model for the three sampling years.

| <b>Source</b>            | <b><math>\chi^2</math></b> | <b>Df</b> | <b>Pr(&gt;Dev)</b> |
|--------------------------|----------------------------|-----------|--------------------|
| <b>2019</b>              |                            |           |                    |
| Sampling Date            | 75.4172                    | 1         | <2e-16 ***         |
| NI                       | 1.7093                     | 1         | 0.1911             |
| Sampling Date * NI       | 6.1026                     | 1         | 0.0135 *           |
| <b>2020</b>              |                            |           |                    |
| Sampling Date            | 15.9603                    | 1         | 6.469e-05 ***      |
| Location                 | 6.2388                     | 3         | 0.100551           |
| Sampling Date * Location | 11.4717                    | 3         | 0.009431 **        |
| <b>2021</b>              |                            |           |                    |
| Sampling Date            | 44.8196                    | 1         | 2.16e-11 ***       |
| Location                 | 11.4456                    | 3         | 0.009545 **        |
| Sampling Date * Location | 3.2466                     | 3         | 0.355146           |

**Table S7.** Post-hocs analyses of the ANOVA computed on the *D. puntazzo* glmmTMB model for the factor location in 2021.

| <b>Pairwise comparison</b>  | <b>Estimate</b> | <b>SE</b> | <b>df</b> | <b>t.ratio</b> | <b>P-value</b> |
|-----------------------------|-----------------|-----------|-----------|----------------|----------------|
| Cap Ferrat vs. Espalmador   | -1.219          | 0.491     | 443       | -2.483         | 0.0640         |
| Cap Ferrat vs. Eze -sur-Mer | -0.679          | 0.508     | 443       | -1.337         | 0.5400         |
| Cap Ferrat vs. Marinieres   | -1.392          | 0.490     | 443       | -2.842         | 0.0242*        |
| Espalmador vs. Eze-sur-Mer  | 0.541           | 0.422     | 443       | 1.281          | 0.5757         |
| Espalmador vs. Marinieres   | -0.172          | 0.399     | 443       | -0.432         | 0.9729         |
| Eze-sur-Mer vs. Marinieres  | -0.713          | 0.421     | 443       | -1.695         | 0.3274         |

**Table S8.** Outputs of the ANOVA computed on the *D. vulgaris* glmmTMB model for the three sampling years.

| <b>Source</b>            | <b><math>\chi^2</math></b> | <b>Df</b> | <b>Pr(&gt;Dev)</b> |
|--------------------------|----------------------------|-----------|--------------------|
| <b>2019</b>              |                            |           |                    |
| Sampling Date            | 13.6133                    | 1         | 0.0002246 ***      |
| NI                       | 8.6836                     | 1         | 0.0032108 **       |
| Sampling Date * NI       | 7.6929                     | 1         | 0.0055437 **       |
| <b>2020</b>              |                            |           |                    |
| Sampling Date            | 43.752                     | 1         | 3.728e-11 ***      |
| Location                 | 22.853                     | 3         | 4.333e-05 ***      |
| Sampling Date * Location | 7.887                      | 3         | 0.04841 *          |
| <b>2021</b>              |                            |           |                    |
| Sampling Date            | 2.8099                     | 1         | 0.093687           |
| Location                 | 13.8355                    | 3         | 0.003138 **        |
| Sampling Date * Location | 2.3496                     | 3         | 0.503084           |

**Table S9.** Post-hocs analyses of the ANOVA computed on the *D. vulgaris* glmmTMB model for the factor location in 2021.

| Pairwise comparison         | Estimate | SE    | df  | t.ratio | P-value    |
|-----------------------------|----------|-------|-----|---------|------------|
| Cap Ferrat vs. Espalmador   | -0.169   | 0.501 | 443 | -0.338  | 0.9867     |
| Cap Ferrat vs. Eze -sur-Mer | 1.437    | 0.567 | 443 | 2.537   | 0.0558     |
| Cap Ferrat vs. Marinieres   | -0.639   | 0.498 | 443 | -1.282  | 0.5750     |
| Espalmador vs. Eze-sur-Mer  | 1.607    | 0.548 | 443 | 2.934   | 0.0184 *   |
| Espalmador vs. Marinieres   | -0.469   | 0.475 | 443 | -0.989  | 0.7556     |
| Eze-sur-Mer vs. Marinieres  | -2.076   | 0.543 | 443 | -3.822  | 0.0009 *** |

**Table S10.** Output of the ANOVA computed on the *S. salpa* glmmTMB model for 2020.

| <b>Source</b>            | <b><math>\chi^2</math></b> | <b>Df</b> | <b>Pr(&gt;Dev)</b> |
|--------------------------|----------------------------|-----------|--------------------|
| Sampling Date            | 19.4455                    | 1         | 1.035e-05 ***      |
| Location                 | 1.2447                     | 3         | 0.7423             |
| Sampling Date * Location | 3.1778                     | 3         | 0.3650             |
